# Supplementary material
Source: PubMed Central journal article supplement (PMC9272916)
Supplement: ehp10197.smcontents.508.pdf [file ehp10197.smcontents.508.pdf]

**Note to readers with disabilities:** *EHP* strives to ensure that all journal content is accessible to all readers. However, some figures and Supplemental Material published in *EHP* articles may not conform to [508 standards](#) due to the complexity of the information being presented. If you need assistance accessing journal content, please contact [ehp508@niehs.nih.gov](mailto:ehp508@niehs.nih.gov). Our staff will work with you to assess and meet your accessibility needs within 3 working days.

### **Supplemental Material**

#### **Environmental Noise and Effects on Sleep: An Update to the WHO Systematic Review and Meta-Analysis**

Michael G. Smith, Makayla Cordoza, and Mathias Basner

#### **Table of Contents**

**Table S1.** PRISMA 2020 checklist.

**Table S2.** Electronic search terms for each of the four databases searched in the systematic review.

**Table S3.** Studies not included in meta-analysis.

**Table S4.** Bias assessment for individual studies. Parts of this table are reproduced from the WHO 2018 review.

**Table S5.** Odds Ratios (OR) for the probability of being highly sleep disturbed when exposed to road or railway traffic noise, stratified by studies that were judged to have a low or high risk of bias (ROB) in the noise exposure assessment. Analyses were restricted to combined estimates of sleep disturbance derived from different studies that were judged to have both low and high ROB.

**Table S6.** Odds Ratios (OR) for the probability of being highly sleep disturbed when exposed to traffic noise, including study location as a fixed effect in the logistic regression.

**Table S7.** Polynomial equations for the probability of being highly sleep disturbed by traffic noise.

**Figure S1.** Effective sample sizes for combined estimate in the updated analysis compared to the WHO 2018 review. The combined estimate was calculated as the average of sleep disturbance questions within individual studies. There were a total  $n=64,090$  responses in the WHO review and  $n=170,972$  responses ( $n=106,882$  new) in the updated analysis.

**Figure S2.** Funnel plots for aircraft, road, and railway noise, stratified by whether or not the sleep disturbance question mentioned noise. Odds ratios (OR) are calculated as the combined estimate for each individual study.

**Figure S3.** Proportion of respondents from European studies (hatched red) and non-European studies (solid blue) for each sleep disturbance question and noise source.

## References
